# Supplementary material
Source: publisher site journal article supplement (https://www.degruyterbrill.com/publication/isbn/9783110301342/downloadAsset/9783110301342_Inhaltsverzeichnis.pdf)
Supplement: Supplementary file 1 [file 9783110301342_Inhaltsverzeichnis.pdf]

# Inhalt

## Überblick über die Edition — V

### **Vorwort: Nach der Archivrevolution**

Neue Perspektiven auf das deutsch-sowjetische Verhältnis und die Geschichte des deutschen Kommunismus — 1

Hermann Weber

### **Zum Verhältnis von Komintern, Sowjetstaat und KPD**

Eine historische Einführung — 9

Zur Entstehungsgeschichte der kommunistischen Bewegung — 9

1919–1923: Die Anfänge von KPD und Komintern — 21

1924–1929: Die Stalinisierung von KPD und Komintern — 50

1929–1933: Erfolge der KPD, doch Sieg der NSDAP — 74

1933–1939: Zerschlagung der KPD und zwiespältige Haltung von Komintern und UdSSR — 100

1939–1943: Stalin-Hitler-Pakt, Deutscher Überfall und Auflösung der Komintern — 125

Jakov Drabkin

### **Die Idee der Weltrevolution und ihre Transformation in der Kominterngeschichte — 140**

Vorbemerkung — 140

Zur Idee der „sozialistischen Weltrevolution“ — 142

Russische Revolutionen 1917 und Brester Frieden — 146

Novemberrevolutionen 1918 in Europa und Gründung der Komintern — 149

„Stab der Weltrevolution“ — 156

„Vom Sturm zur Belagerung“ — 163

Zur militärischen und konspirativen Tätigkeit der Kommunisten — 167

„Sozialismus in einem Land“? — 172

Programmdebatten in der Komintern — 183

Weltwirtschaftskrise und „linker Kurs“ — 187

Hitlerdiktatur und Antifaschismus — 193

Die neue Strategie und der Stalinismus — 197

Anwachsende Kriegsgefahr — 205

Im Zweiten Weltkrieg — 210

Hitlers Krieg gegen die Sowjetunion — 216

Das Ende der Komintern — 219

Nochmals zur Idee und Praxis — 222

Bernhard H. Bayerlein

**Deutscher Kommunismus und transnationaler Stalinismus –  
Komintern, KPD und Sowjetunion 1929–1943**

Neue Dokumente zur Konzeptualisierung einer verbundenen Geschichte — 225

Stalinismus, KPD, deutsch-sowjetische Beziehungen und  
„Deutschland-Russland-Komplex“ 1929–1943 — 226

KPD, Komintern und VKP(b) bis zur „Machtergreifung“ 1933 — 245

Schicksalsjahr 1933. KPD, Komintern und VKP(b) von der „Machtergreifung“  
Hitlers bis zum Reichstagsbrandprozess — 262

Antifaschistischer Widerstand, NS-Terror, Zersetzung der KPD nach innen und  
Verböten des Terrors (1933–1935) — 295

Volksfronten und Terror 1934–1936: Verborgene Logiken des Antifaschismus der  
Komintern — 314

Keine „Propaganda als Waffe“: Volksfront, Nationale Versöhnung und  
Volksdemokratie für Deutschland (1936–1939) — 331

Deutscher Kommunismus und stalinistischer Terror 1935–1939 — 353

Ausblick: Vom Stalin-Hitler-Pakt bis zur Auflösung der Komintern  
(1939–1943) — 386

Statt einer Bilanz:

Für einen neuen Diskurs über Geschichte — 395

Alexander Galkin

**Über einige Entstehungsphasen der internationalen Arbeiterbewegung — 401**

Die Dynamik der Lohnarbeit — 401

Die Erste Internationale — 408

Belebung und Aufstieg der Arbeiterbewegung — 414

Die Zweite Internationale — 422

Das tragische Ende der Zweiten Internationale — 430

Jahre verschärfter Gegenwehr — 432

**Verzeichnis der im II. Teil publizierten Dokumente**

(Archive des Kommunismus 6/1 und 6/2) — 436

**Abkürzungen — 463**

**Zu den Autoren — 466**

**Personenregister — 468**
